# Supplementary material for: Neutral ‘3 + 1’ mixed-ligand oxorhenium(V) complexes with tridentate [S,N,S] chelates and aminoalkanethiols: synthesis, characterization and structure determination ‡
Source: Royal Society of Chemistry journal article supplement (doi:10.1039/b001600o), 2000-01-01
Supplement: b001600o.doc [file b001600o.doc]

**Table A**

| **No.** | **Formula** | **Yielda (%)** | **Mp.** | **Elemental analyses (%)b** | | | |
| --- | --- | --- | --- | --- | --- | --- | --- |
|  |  |  | **(°C)** | **C** | **H** | **N** | **S** |
|  |  |  |  |  |  |  |  |
| **1a** | C9H21N2OReS3 | 25.5 mg, (28) | 124 | 23.5 (23.7) | 4.6 (4.7) | 6.3 (6.2) | 20.8 (21.1) |
| **1b** | C11H25N2OReS3 | 30.0 mg, (31) | 168-174 | 27.4 (27.3) | 5.3 (5.2) | 5.9 (5.8) | 19.7 (19.9) |
| **1c** | C15H33N2OReS3 | 23.7 mg, (22) | - | 33.6 (33.4) | 6.3 (6.2) | 4.9 (5.2) | 18.1 (17.8) |
| **1d** | C12H25N2OReS3 | 35.7 mg, (36) | 201-210 | 28.9 (29.1) | 4.9 (5.1) | 5.7 (5.7) | 19.6 (19.4) |
| **1e** | C11H23N2O2ReS3 | 41.8 mg, (42) | 164 | 26.6 (26.6) | 4.8 (4.7) | 5.5 (5.6) | 19.2 (19.3) |
| **1f** | C14H27N2O3ReS3 | 31.0 mg, (28) | 186-189 | 30.5 (30.4) | 4.9 (4.9) | 5.0 (5.1) | 17.6 (17.4) |
| **1g** | C12H23N2O2ReS3 | 26.5 mg, (26) | 190-195 | 28.2 (28.3) | 4.5 (4.6) | 5.8 (5.5) | 19.2 (18.9) |
| **2a** | C10H23N2OReS3 | 28.2 mg, (30) | 103-104 | 25.7 (25.6) | 5.0 (4.9) | 5.8 (6.0) | 20.2 (20.5) |
| **2b** | C12H27N2OReS3 | 30.8 mg, (31) | 92-94 | 28.8 (29.0) | 5.4 (5.5) | 5.5 (5.6) | 19.1 (19.3) |
| **2c** | C16H35N2OReS3 | 14.3 mg, (13) | 94-98 | 34.3 (34.7) | 6.1 (6.4) | 4.8 (5.1) | 17.8 (17.4) |
| **2d** | C13H27N2OReS3 | 24.4 mg, (24) | 130-134 | 30.4 (30.6) | 5.3 (5.3) | 5.3 (5.5) | 18.8 (18.9) |
| **2e** | C12H25N2O2ReS3 | 41.0 mg, (40) | 170-173 | 28.0 (28.2) | 4.8 (4.9) | 5.2 (5.5) | 18.6 (18.8) |
| **2f** | C15H29N2O3ReS3 | 36.3 mg, (32) | 194-196 | 31.9 (31.7) | 5.3 (5.2) | 5.1 (4.9) | 17.3 (16.9) |
| **2g** | C13H25N2O2ReS3 | 28.3 mg, (27) | 189-196 | 29.9 (29.8) | 5.0 (4.8) | 5.2 (5.4) | 18.1 (18.4) |
| **3a** | C11H25N2OReS3 | 21.3 mg, (22) | 112-115 | 27.1 (27.3) | 5.1 (5.2) | 5.9 (5.8) | 20.2 (19.9) |
| **3b** | C13H29N2OReS3 | 19.4 mg, (19) | 110-113 | 30.5 (30.5) | 5.6 (5.7) | 5.8 (5.5) | 18.5 (18.8) |
| **3c** | C17H37N2OReS3 | 26.1 mg, (23) | 113-115 | 36.0 (36.0) | 6.5 (6.6) | 4.8 (4.9) | 17.1 (16.9) |
| **3d** | C14H29N2OReS3 | 18.9 mg, (18) | 134-156 | 32.0 (32.1) | 5.4 (5.6) | 5.2 (5.4) | 18.7 (18.4) |
| **3e** | C13H27N2O2ReS3 | 30.5 mg, (29) | 161 | 29.8 (29.7) | 5.3 (5.2) | 5.2 (5.3) | 18.1 (18.3) |
| **3f** | C16H31N2O3ReS3 | 27.9 mg, (24) | 111-116 | 33.2 (33.0) | 5.5 (5.4) | 4.6 (4.8) | 16.7 (16.5) |
| **3g** | C14H27N2O2ReS3 | 22.6 mg, (21) | 133-134 | 31.1 (31.3) | 5.0 (5.1) | 5.4 (5.2) | 17.6 (17.9) |
| **4a** | C12H27N2OReS3 | 13.9 mg, (14) | - | 28.8 (29.0) | 5.3 (5.5) | 5.3 (5.6) | 19.5 (19.3) |
| **4b** | C14H31N2OReS3 | 16.8 mg, (16) | - | 32.3 (32.0) | 6.1 (5.9) | 5.5 (5.3) | 18.0 (18.3) |
| **4c** | C18H39N2OReS3 | 12.8 mg, (11) | - | 37.5(37.2) | 7.0(6.8) | 5.2(4.8) | 14.8(16.5) |
| **4d** | C15H31N2OReS3 | 19.3 mg, (18) | 133-156 | 33.3 (33.5) | 5.6 (5.8) | 5.4 (5.2) | 18.2 (17.9) |
| **4e** | C14H29N2O2ReS3 | 23.7 mg, (22) | 135-138 | 31.2 (31.2) | 5.4 (5.4) | 5.1 (5.2) | 18.0 (17.8) |

**a** yields were calculated referred to the used precursor, b calculated data in parentheses

**Table B**

| **Complex** | **MS dataa**  ***m/z* ([M]–)** | | **(Re=O)b**  **(cm–1)** | |  | | **Complex** | | **MS dataa**  ***m/z* ([M]–)** | | **(Re=O)b**  **(cm–1)** |
| --- | --- | --- | --- | --- | --- | --- | --- | --- | --- | --- | --- |
|  |  |  | |  | |  | |  | |  | |
| **1a** | 454, 456 | | 952.3 | |  | | **3a** | | 482, 484 | | 947.9 |
| **1b** | 482, 484 | | 948.2 | |  | | **3b** | | 510, 512 | | 949.3 |
| **1c** | 538, 540 | | 954.7 | |  | | **3c** | | 566, 568 | | 947.4 |
| **1d** | 494, 496 | | 948.4 | |  | | **3d** | | 522, 524 | | 955.7 |
| **1e** | 496, 498 | | 950.0 | |  | | **3e** | | 524, 526 | | 950.7 |
| **1f** | 552, 554 | | 944.0 | |  | | **3f** | | 580, 582 | | 951.3 |
| **1g** | 508, 510 | | 952.0 | |  | | **3g** | | 536, 538 | | 951.0 |
| **2a** | 468, 470 | | 960.3 | |  | | **4a** | | 496, 498 | | – |
| **2b** | 496, 498 | | 952.1 | |  | | **4b** | | 524, 526 | | – |
| **2c** | 552, 554 | | 952.0 | |  | | **4c** | | *–* | | – |
| **2d** | 508, 510 | | 952.1 | |  | | **4d** | | 536, 538 | | 952.3 |
| **2e** | 510, 512 | | 948.4 | |  | | **4e** | | 538, 540 | | 952.1 |
| **2f** | 566, 568 | | 944.3 | |  | |  | |  | |  |
| **2g** | 522, 524 | | 946.9 | |  | |  | |  | |  |

**a** Ionization technique: chemical ionisation (CI), Ionization gas: methane, analyses with negative polarisation; **b** measured in KBr-pellets
